# Supplementary material for: Using mobile device built-in microphones to monitor bats: a new opportunity for large-scale participatory science initiatives
Source: Springer Nature journal article supplement (doi:10.1007/s10531-024-02818-9), 2024-03-18
Supplement: MOESM2 [file 26874018]

## Appendix S2 - Reference calls used in the analysis of detectability

For the analysis of detectability, 32 reference call sequences of 21 potential target species were selected from Russ (2021) and Middleton et al. (2022) and played back on an ultrasound speaker at real-time speed. These full-spectrum sequences included echolocation and social calls. Here we provide the original reference call sequence list, detailing emitting species, call type (including social call subtype, where available), selected interval (with call repetition information), and any volume adjustments.

| source                  | species                          | original file name                                                                                                  | call type     | interval used (ms)          | volume |
|-------------------------|----------------------------------|---------------------------------------------------------------------------------------------------------------------|---------------|-----------------------------|--------|
| Middleton et al. (2022) | <i>Eptesicus nilssonii</i>       | 8.7.19 - Northern bat - FS - K Isaksen 2013.wav                                                                     | social (C)    | 0-1300                      | same   |
| Middleton et al. (2022) | <i>Eptesicus serotinus</i>       | 8.7.04 - Serotine - FS - M Van De Sijpe 2021.wav                                                                    | social (C)    | 63000-64000 (x3)            | up     |
| Middleton et al. (2022) | <i>Eptesicus serotinus</i>       | 8.7.07 - Serotine - FS - N Middleton A Froud K French 2021.wav                                                      | social        | 2500-4500                   | up     |
| Russ (2021)             | <i>Hypsugo savii</i>             | 8.36.6 Hypsugo savii - Social song - Leonardo Ancillotto - Italy.wav                                                | social        | 0-1500                      | down   |
| Russ (2021)             | <i>Nyctalus lasiopterus</i>      | 8.22.1 and 2 Nyctalus lasiopterus - Echolocation calls of a bat flying at altitude - Marc van de Sijpe - France.wav | echolocation  | 4500-12500                  | up     |
| Russ (2021)             | <i>Nyctalus leisleri</i>         | 8.23.1 Nyctalus leisleri - Echolocation 13 - Jon Russ - Northern Ireland.wav                                        | echolocation  | whole                       | down   |
| Middleton et al. (2022) | <i>Nyctalus leisleri</i>         | 8.4.18 - Leislars - FS - M Aston 2021.wav                                                                           | social (C.d1) | 3500-5500 (x3)              | down   |
| Middleton et al. (2022) | <i>Nyctalus leisleri</i>         | 8.4.19 - Leislars - FS - A Hargreaves 2013.wav                                                                      | social (D1)   | 150-400 (x3)                | up     |
| Middleton et al. (2022) | <i>Nyctalus leisleri</i>         | 8.4.22 - Leislars - FS - H Pearce 2021.wav                                                                          | social (D2)   | 100-350 (x3)                | up     |
| Russ (2021)             | <i>Nyctalus noctula</i>          | 8.21.2 Nyctalus noctula - Echolocation open habitat 2 - Jon Russ- United Kingdom.wav                                | echolocation  | whole                       | up     |
| Middleton et al. (2022) | <i>Nyctalus noctula</i>          | 8.4.01 - Noctule - FS - N Middleton A Froud K French 2021.wav                                                       | social (C.d1) | whole                       | same   |
| Russ (2021)             | <i>Nyctalus noctula</i>          | 8.21.9 Nyctalus noctula - Social 8 - David Lee- United Kingdom.wav                                                  | social (D2)   | 350-600_1400-1600_2750-2950 | same   |
| Russ (2021)             | <i>Nyctalus noctula</i>          | 8.21.16 Nyctalus noctula - Social 9 - Jon Russ- United Kingdom.wav                                                  | social        | 1000-2000 (x3)              | up     |
| Russ (2021)             | <i>Pipistrellus kuhlii</i>       | 8.34.9 Pipistrellus kuhlii - Social calls - Marc van de Sijpe - France.wav                                          | social (D)    | 800-1000 (x3)               | same   |
| Middleton et al. (2022) | <i>Pipistrellus nathusii</i>     | 8.6.27 - Nathusius pipistrelle - FS - N Middleton A Froud K French 2021.wav                                         | social (D)    | whole (x3)                  | down   |
| Middleton et al. (2022) | <i>Pipistrellus pipistrellus</i> | 8.6.02 - Common pipistrelle - FS - M Aston 2021.wav                                                                 | social (D)    | 4400-4700 (x3)              | same   |
| Middleton et al. (2022) | <i>Pipistrellus pygmaeus</i>     | 8.6.12 - Soprano pipistrelle - FS - N Middleton A Froud K French 2021.wav                                           | social (D)    | 0-650 (x3)                  | same   |
| Middleton et al. (2022) | <i>Rhinolophus ferrumequinum</i> | 8.2.03 - Greater horseshoe - FS - N Middleton A Froud K French 2021.wav                                             | social        | 600-2100                    | same   |
| Russ (2021)             | <i>Tadarida teniotis</i>         | 8.44.1 Tadarida teniotis - Typical echolocation calls - Leonardo Ancillotto - Italy.wav                             | echolocation  | 0-2000 (x3)                 | same   |
| Russ (2021)             | <i>Tadarida teniotis</i>         | 8.44.6 Tadarida teniotis - Social calls recorded in flight 2 - Yves Bas - France.wav                                | social        | 900-1900 (x3)               | same   |
| Russ (2021)             | <i>Tadarida teniotis</i>         | 8.44.7 Tadarida teniotis - V-shaped social calls - Marc van de Sijpe - France.wav                                   | social        | 3000-8000                   | up     |
| Middleton et al. (2022) | <i>Vespertilio murinus</i>       | 8.5.02 - Parti-coloured bat - FS - I Kaergaard 2020.wav                                                             | social (D)    | 1100-3500                   | same   |
| Middleton et al. (2022) | <i>Barbastella barbastellus</i>  | 8.9.13 - Barbastelle - FS - P Briggs H Pearce B Briggs 2020.wav                                                     | social        | 3550-3750 (x3)              | down   |
| Russ (2021)             | <i>Myotis bechsteinii</i>        | 8.17.10 Myotis bechsteinii - Social call at roost 2 - Marc van de Sijpe - Germany.wav                               | social        | 1500-4000                   | up     |
| Russ (2021)             | <i>Myotis dasycneme</i>          | 8.7.9 Myotis dasycneme - Social calls from maternity colony - Carola van den Tempel - Netherlands.wav               | social        | 2500-3700 (x3)              | down   |
| Russ (2021)             | <i>Myotis myotis</i>             | 8.18.7 Myotis myotis - Male song - Joanna Furmankiewicz - Poland.wav                                                | social        | 0-400 (x3)                  | same   |
| Russ (2021)             | <i>Nyctalus lasiopterus</i>      | 8.22.3 Nyctalus lasiopterus - Flying in semi-clutter - Marc van de Sijpe - France.wav                               | echolocation  | 6500-9700                   | same   |
| Russ (2021)             | <i>Pipistrellus maderensis</i>   | 8.35.11 Pipistrellus maderensis - Social call 3 - SÇrgio Teixeira - Madeira.wav                                     | social        | whole (x3)                  | down   |
| Middleton et al. (2022) | <i>Plecotus auritus</i>          | 8.8.03 - Brown long-eared - FS - I Kaergaard 2020.wav                                                               | social        | 7000-9000                   | up     |
| Middleton et al. (2022) | <i>Plecotus austriacus</i>       | 8.8.19 - Grey long-eared - FS - A Hall 2021.wav                                                                     | social        | 500-2500                    | up     |
| Russ (2021)             | <i>Plecotus sardus</i>           | 8.40.2 Plecotus sardus - Social calls - Mauro Mucedda - Sardinia.wav                                                | social        | whole (x3)                  | same   |
| Russ (2021)             | <i>Vespertilio murinus</i>       | 8.29.9 Vespertilio murinus - Social calls 3 not common - Bengt Edqvist - Sweden.wav                                 | social        | 2000-4000                   | up     |
