# Supplementary material for: Using mobile device built-in microphones to monitor bats: a new opportunity for large-scale participatory science initiatives
Source: Springer Nature journal article supplement (doi:10.1007/s10531-024-02818-9), 2024-03-18
Supplement: MOESM4 [file 26874018]

## Appendix S4.b - Games-Howell post-hoc test pairwise comparisons (mean peak frequency differences)

The similarity between bat calls was also quantified by measuring the mean peak frequency of each call. The arithmetic sum of the two mean peak frequencies of each call pair (i.e., the call recorded by mobile device and the same call recorded by the bat detector) was then performed. The Games-Howell post-hoc test identified significant variations in frequency differences between device model pairs, even within the same brand. Here we show all pairwise comparisons from Games-Howell post-hoc test. For each comparison, p value is reported; non-significant relationships are expressed as “ns”.

| DEV. MODEL | A1530  | A2105 | A2218  | A2296 | A2633  | FIG-LX1 | HMA-L29 | M1908C3XG | M2003J6B2G | M2010J19SY | SM-A515F | SM-G950F |
|------------|--------|-------|--------|-------|--------|---------|---------|-----------|------------|------------|----------|----------|
| A2105      | <0.01  |       |        |       |        |         |         |           |            |            |          |          |
| A2218      | ns     | <0.05 |        |       |        |         |         |           |            |            |          |          |
| A2296      | <0.05  | ns    | <0.01  |       |        |         |         |           |            |            |          |          |
| A2633      | ns     | ns    | ns     | ns    |        |         |         |           |            |            |          |          |
| FIG-LX1    | ns     | ns    | ns     | ns    | ns     |         |         |           |            |            |          |          |
| HMA-L29    | ns     | <0.01 | ns     | ns    | ns     | ns      |         |           |            |            |          |          |
| M1908C3XG  | <0.001 | <0.01 | <0.001 | <0.05 | <0.001 | <0.05   | <0.001  |           |            |            |          |          |
| M2003J6B2G | ns     | ns    | ns     | ns    | ns     | ns      | ns      | <0.01     |            |            |          |          |
| M2010J19SY | <0.05  | ns    | <0.01  | ns    | ns     | ns      | <0.05   | <0.05     | ns         |            |          |          |
| SM-A515F   | ns     | ns    | ns     | ns    | ns     | ns      | ns      | <0.001    | ns         | ns         |          |          |
| SM-G950F   | <0.05  | ns    | <0.05  | ns    | ns     | ns      | <0.05   | <0.01     | ns         | ns         | ns       |          |
| SM-T819    | <0.05  | ns    | <0.05  | ns    | ns     | ns      | <0.01   | <0.01     | ns         | ns         | ns       | ns       |
