# Supplementary material for: Using mobile device built-in microphones to monitor bats: a new opportunity for large-scale participatory science initiatives
Source: Springer Nature journal article supplement (doi:10.1007/s10531-024-02818-9), 2024-03-18
Supplement: MOESM5 [file 26874018]

## Appendix S5 - Results of detectability test for single device model

The following table provides results of detectability test for each device model. The test was performed in daytime, in November 2022 in a 150-m stretch of an unused road outside Turin. For each distance from source (ultrasonic speaker), the number of calls recorded by each device is showed.

| Device type   | Device OS | Brand              | Device model | Device model name   | Number of calls recorded |     |     |      |      |      |
|---------------|-----------|--------------------|--------------|---------------------|--------------------------|-----|-----|------|------|------|
|               |           |                    |              |                     | 2 m                      | 4 m | 8 m | 16 m | 32 m | 64 m |
| Bat detector  |           | Wildlife Acoustics |              | Song Meter Mini Bat | 32                       | 32  | 32  | 30   | 13   | 0    |
| Mobile device | iOS       | Apple              | A2105        | iPhone XR           | 32                       | 32  | 31  | 29   | 21   | 6    |
| Mobile device | iOS       | Apple              | A2218        | iPhone 11 Pro Max   | 32                       | 31  | 31  | 30   | 29   | 12   |
| Mobile device | iOS       | Apple              | A2296        | iPhone SE           | 32                       | 31  | 29  | 27   | 21   | 5    |
| Mobile device | iOS       | Apple              | A2633        | iPhone 13           | 32                       | 32  | 31  | 31   | 29   | 14   |
| Mobile device | Android   | Huawei             | FIG-LX1      | P smart             | 32                       | 32  | 29  | 22   | 7    | 0    |
| Mobile device | Android   | Xiaomi             | M2003J6B2G   | Redmi Note 9 Pro    | 32                       | 32  | 31  | 22   | 8    | 0    |
| Mobile device | Android   | Xiaomi             | M2010J19SY   | Redmi 9T            | 32                       | 32  | 32  | 30   | 22   | 4    |
| Mobile device | Android   | Samsung            | SM-A515F     | Galaxy A51          | 32                       | 32  | 31  | 21   | 10   | 0    |
| Mobile device | Android   | Samsung            | SM-G950F     | Galaxy S8           | 32                       | 32  | 25  | 12   | 3    | 0    |
| Mobile device | Android   | Samsung            | SM-T819      | Galaxy Tab S2       | 32                       | 32  | 29  | 16   | 7    | 0    |
